# Supplementary material for: Serum neuron-specific enolase – reference interval in Danish children and the impact of preanalytical factors
Source: publisher site journal article supplement (doi:10.1515/cclm-2025-0582), 2025-10-02
Supplement: Supplementary file 1 [file j_cclm-2025-0582_suppl_002.pdf]

Supplementary Figure 2:

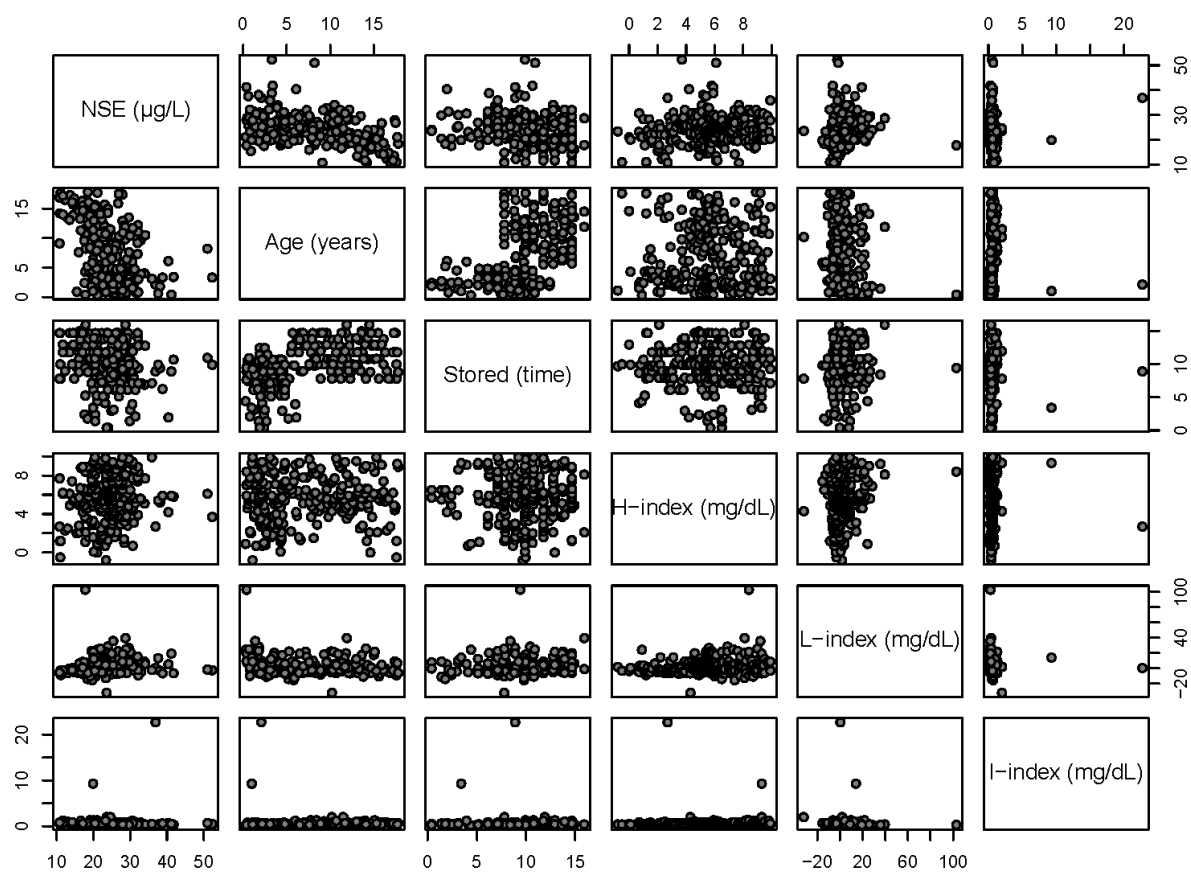

A correlation matrix illustrating the influence of the numerical categories.
